# Supplementary material for: Functional Interaction between HEXIM and Hedgehog Signaling during Drosophila Wing Development
Source: PubMed Central journal article supplement (PMC4866710; doi:10.1371/journal.pone.0155438), 2016-05-13
Supplement: pone.0155438.s009.pdf [file pone.0155438.s009.pdf]

**S1 Table. Phenotype of Hh or HEXIM RNAi mutants.**

| <b>Genotype<sup>e</sup></b> | <b>Phenotype</b>                   | <b>Results<sup>a</sup></b>                                         |
|-----------------------------|------------------------------------|--------------------------------------------------------------------|
| <i>rn&gt;RNAi Hh</i>        | anterior crossvein size/ wing size | 54,4 % (+/- 10,4) <sup>b</sup>                                     |
|                             | L3-L4 area / wing size             | 89 % (+/- 3,1) <sup>c</sup>                                        |
| <i>so&gt;RNAi Hex</i>       | Rought eyes                        | 100 %                                                              |
|                             | Small eyes                         | 61,3 % (+/- 4,8) (male);<br>75,1 % (+/- 4,8) (female) <sup>d</sup> |

<sup>a</sup> Phenotype penetrance is 100% in all cases and they are statistically significant.

<sup>b</sup> Reduction of the anterior crossvein/total wing size ratio (expressed in % of WT); +/-, standard deviation.

<sup>c</sup> Reduction of the L3-L4 area/total wing size ratio (expressed in % of WT).

<sup>d</sup> Eye size is expressed as a % of WT eyes. This phenotype displays a sexual dimorphism.

<sup>e</sup> *rn*: *rotund* ; *so*: *sine-oculis*.
